# Supplementary material
Source: PubMed Central journal article supplement (PMC4000092)
Supplement: embj0033-0762-sd1.pdf [file embj0033-0762-sd1.pdf]

## Supplementary Information.

### Supplementary Figures.

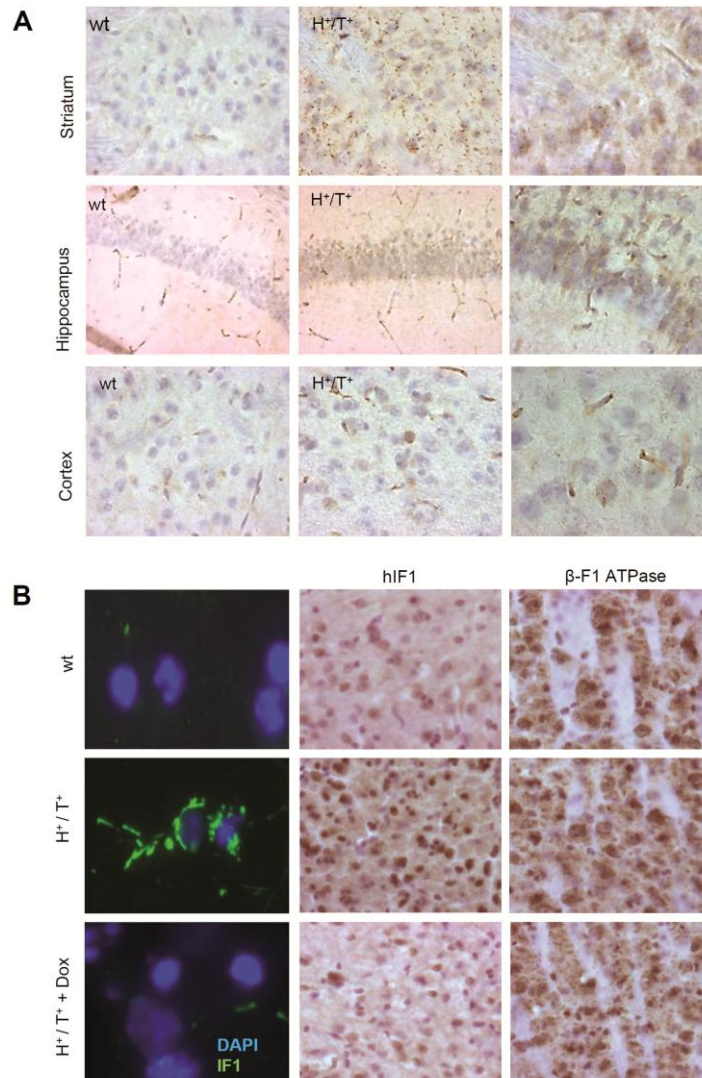

**Figure S1.** (A) Immunohistochemistry of hIF1 in brain striatum, hippocampus and cortex of control (wt) and hIF1 expressing (H<sup>+</sup>/T<sup>+</sup>) mice. Magnification 40x (first and second columns) and 63x (third column). (B) Immunofluorescence (first column) and immunohistochemistry of hIF1 and  $\beta$ -F1-ATPase in the brain of control (wt) and hIF1 expressing (H<sup>+</sup>/T<sup>+</sup>) mice. Note that the oral administration of doxycycline abrogates the expression of hIF1 in H<sup>+</sup>/T<sup>+</sup> mice. Magnification 63x (first column) and 40x (second and third columns).
