# Supplementary material
Source: PubMed Central journal article supplement (PMC4000092)
Supplement: embj0033-0762-sd4.pdf [file embj0033-0762-sd4.pdf]

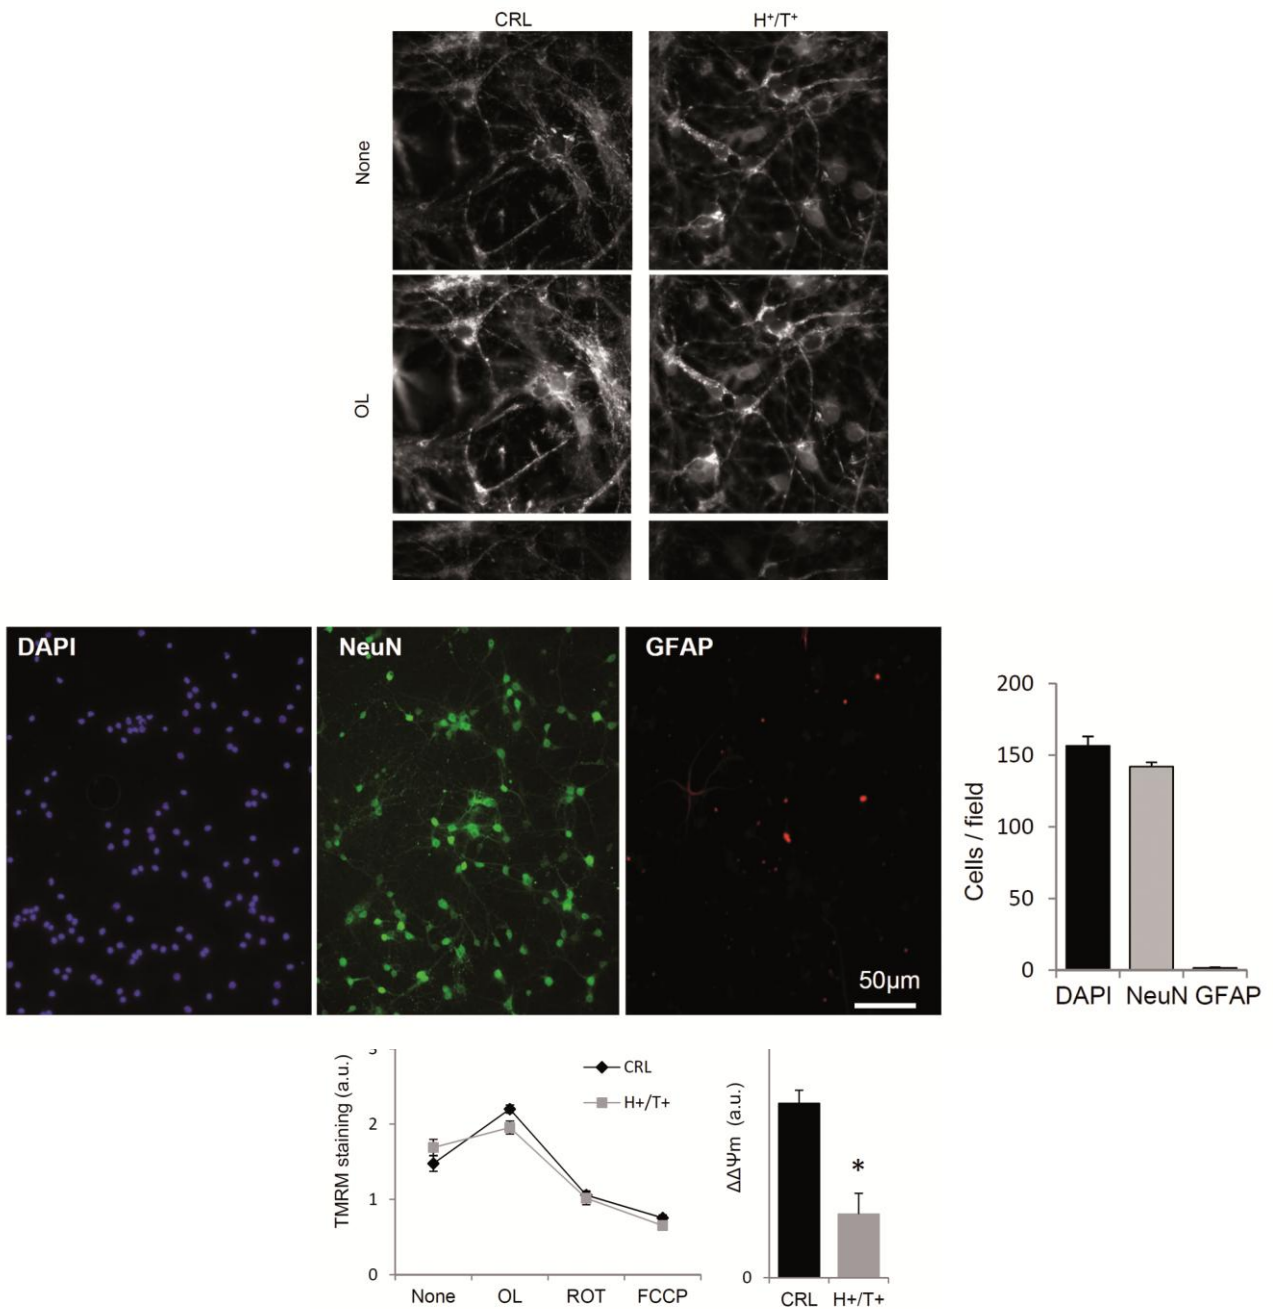

**Figure S4.** Nine days after seeding, the cultures revealed that they were mainly composed of neurons. Immunocytochemistry for the neuronal marker NeuN (green) and the astrocyte marker GFAP (red) in primary cultures of cortical neurons. The nuclei were stained with DAPI (blue). Histograms show the quantification of the number of each cell type per field. Magnification 10x. The data shown are mean  $\pm$  SEM of 7 fields.
