# Supplementary material
Source: PubMed Central journal article supplement (PMC4000092)
Supplement: embj0033-0762-sd5.pdf [file embj0033-0762-sd5.pdf]

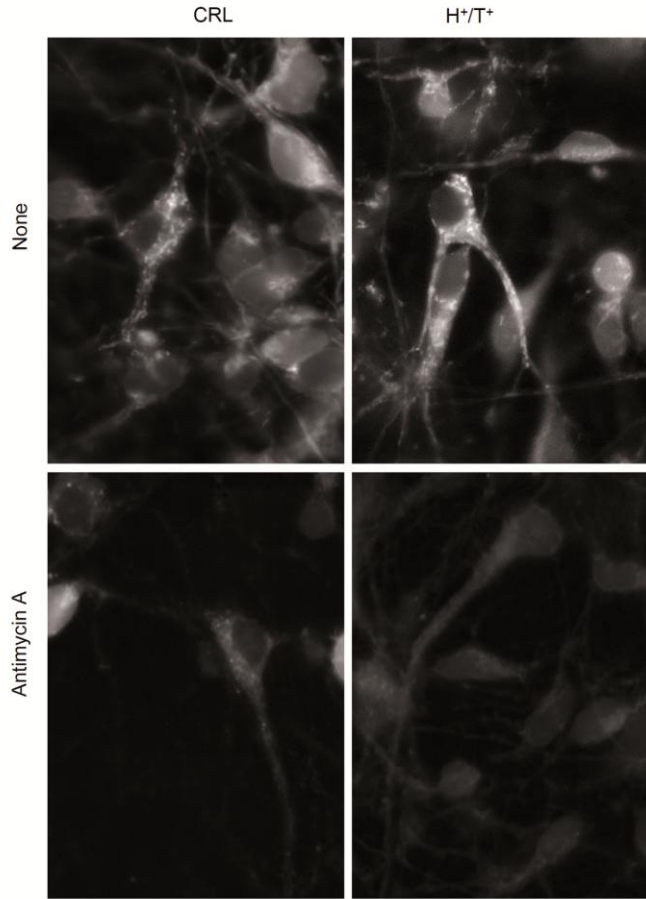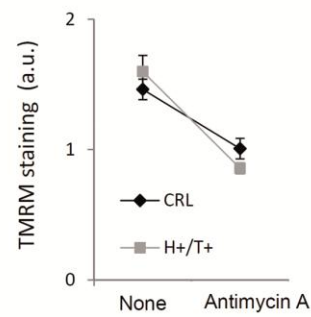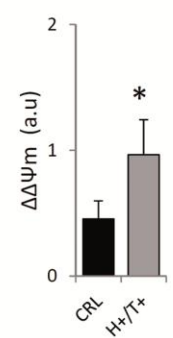

**Figure S5.** *In vivo* staining of TMRM<sup>+</sup> charged mitochondria from 9-10d primary cultures of cortical neurons derived from control (CRL) and H<sup>+</sup>/T<sup>+</sup> embryos. Images and graph represent the sequential cytofluorometric measurements of mitochondrial membrane potential (TMRM staining,  $\Delta\Psi_m$ ) in basal condition (None), after addition of 6 $\mu$ M oligomycin (OL), 1 $\mu$ M rotenone (ROT) and finally 5 $\mu$ M FCCP in the same field. Histograms show the quantification of  $\Delta\Psi_m$  differences between OL treated cells and basal condition. Magnification 40x. The data shown are mean  $\pm$  SEM of 15 fields per condition. \*, p<0.05 when compared to control by Student's t test.
