# Supplementary material
Source: PubMed Central journal article supplement (PMC4000092)
Supplement: embj0033-0762-sd7.pdf [file embj0033-0762-sd7.pdf]

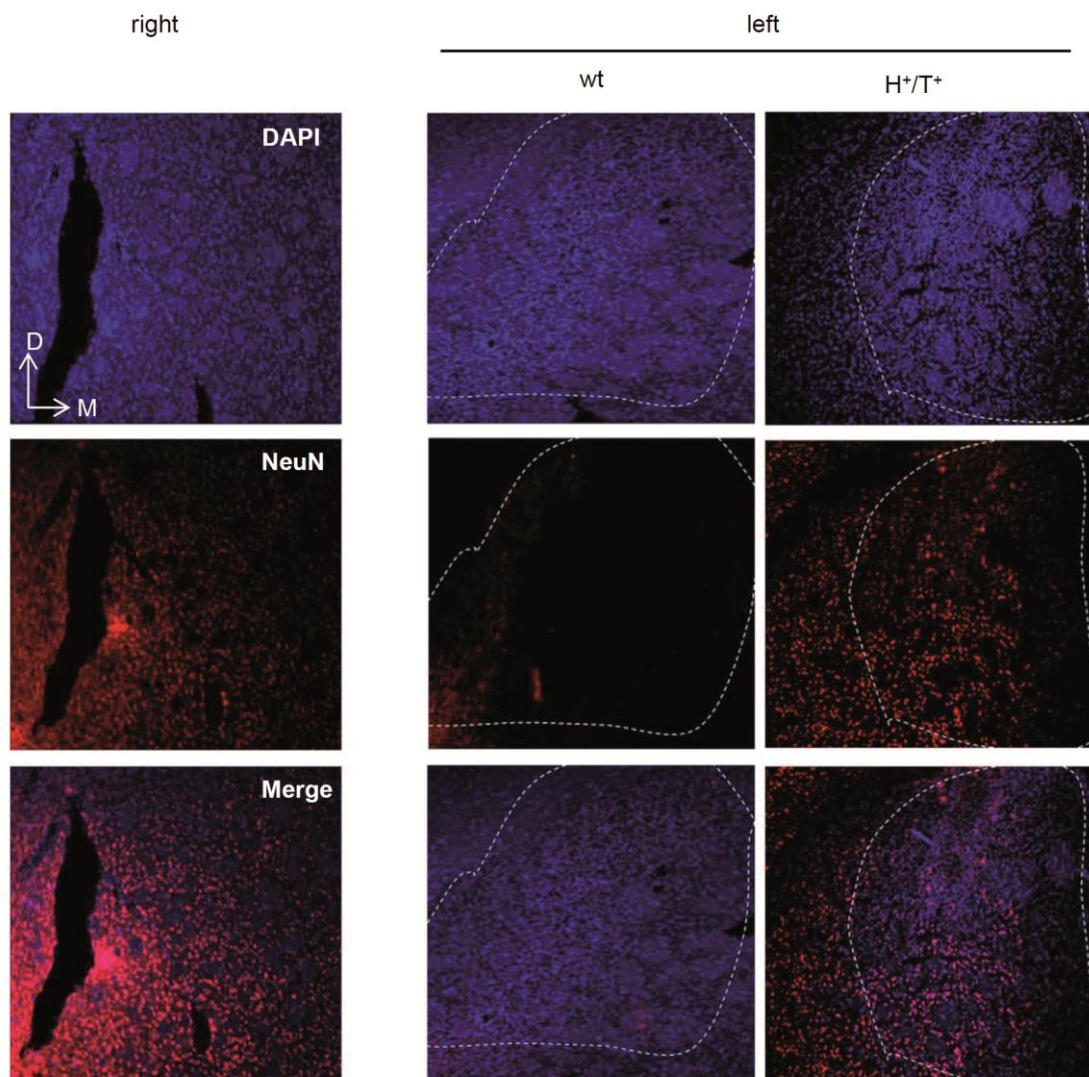

**Figure S7.** Immunohistochemistry for the neuronal marker NeuN (red) in right (non-damaged) and left (damaged) brain hemispheres of control (wt) and hIF1 expressing ( $H^+/T^+$ ) mice. The nuclei have been stained with DAPI (blue). Magnification 10x. Note that at 20 days after surgery the striatum has already started to degenerate and the left hemisphere of control mice showed no NeuN expression in the focus of the lesion. In contrast, visible NeuN-staining was observed in  $H^+/T^+$  mice indicating the partial protection from cell death exerted by hIF1. D, dorsal; M, medial.
