# Supplementary material
Source: PubMed Central journal article supplement (PMC4000092)
Supplement: embj0033-0762-sd9.pdf [file embj0033-0762-sd9.pdf]

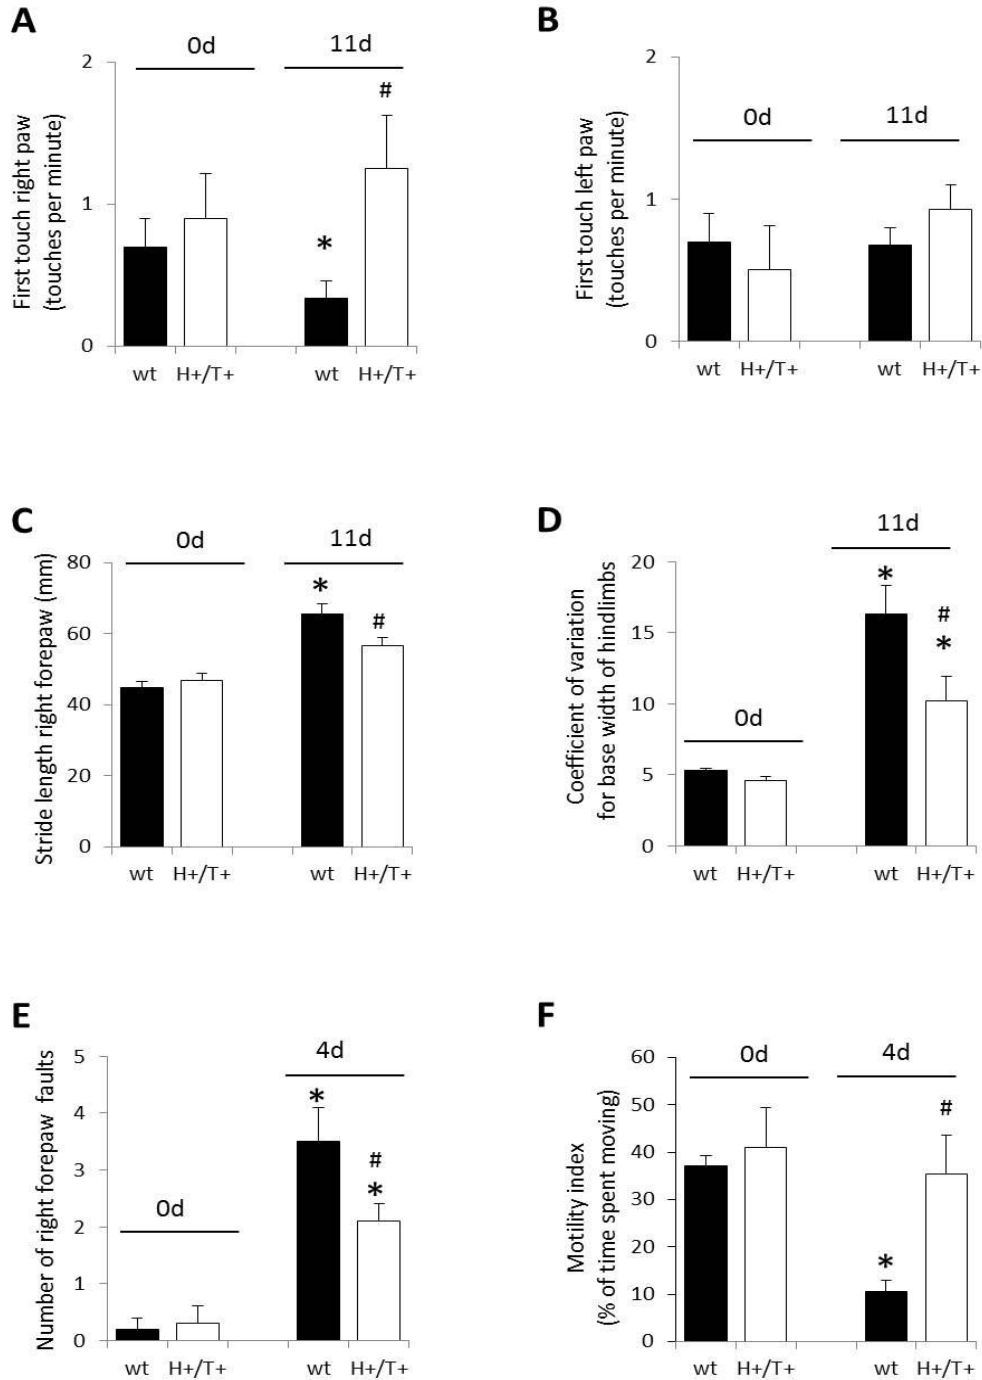

**Figure S9.** Locomotor evaluation indicates better performance in hIF1 expressing mice. Neurological evaluation in control (wt, closed bars) and hIF1 expressing ( $H^+/T^+$ , open bars) mice is shown. Cylinder test (**A** and **B**), foot print analysis (**C** and **D**) and grid test (**E** and **F**) before (0 d) and after four or eleven days (4 d, 11 d) post-surgery. Bars are the mean  $\pm$  SEM. of ten animals. (**A**) Represents the number of the “first touch” per minute using the right paw, which is contralateral to the brain lesion while (**B**) shows
