# Supplementary material
Source: PubMed Central journal article supplement (PMC4000092)

PC: positive control; wt: wild phenotype; T+: tTA positive; H<sup>+</sup>: H49K positive; H<sup>+</sup>/T<sup>+</sup>: double transgenic H49K/tTA

**3B**

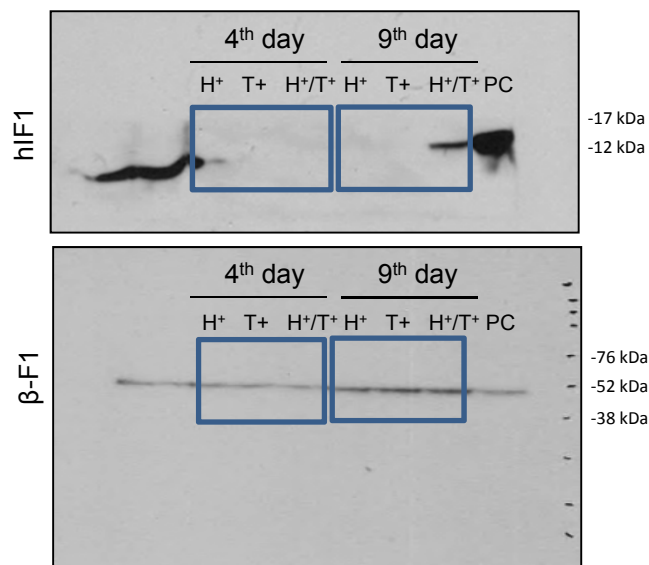

**3J**

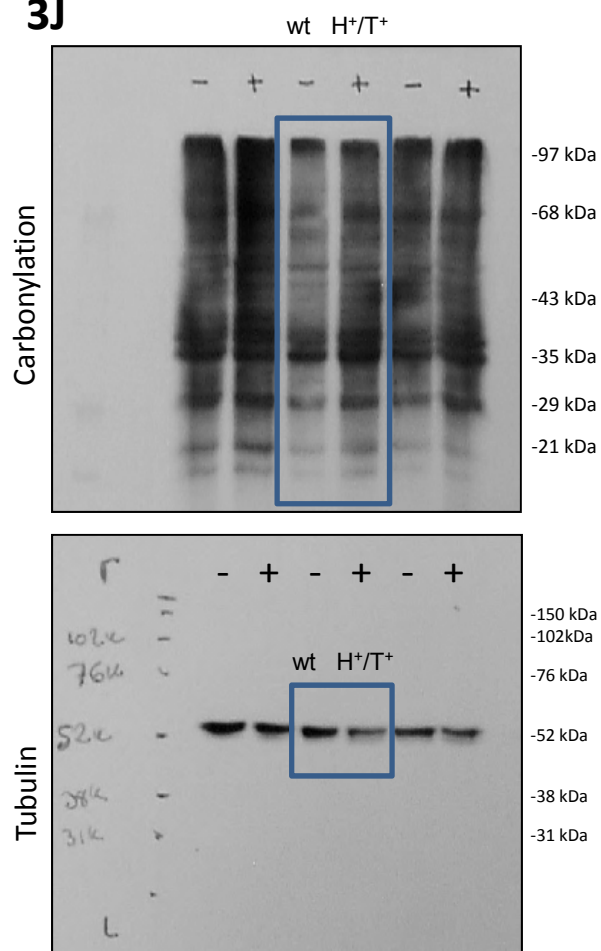

**3G**

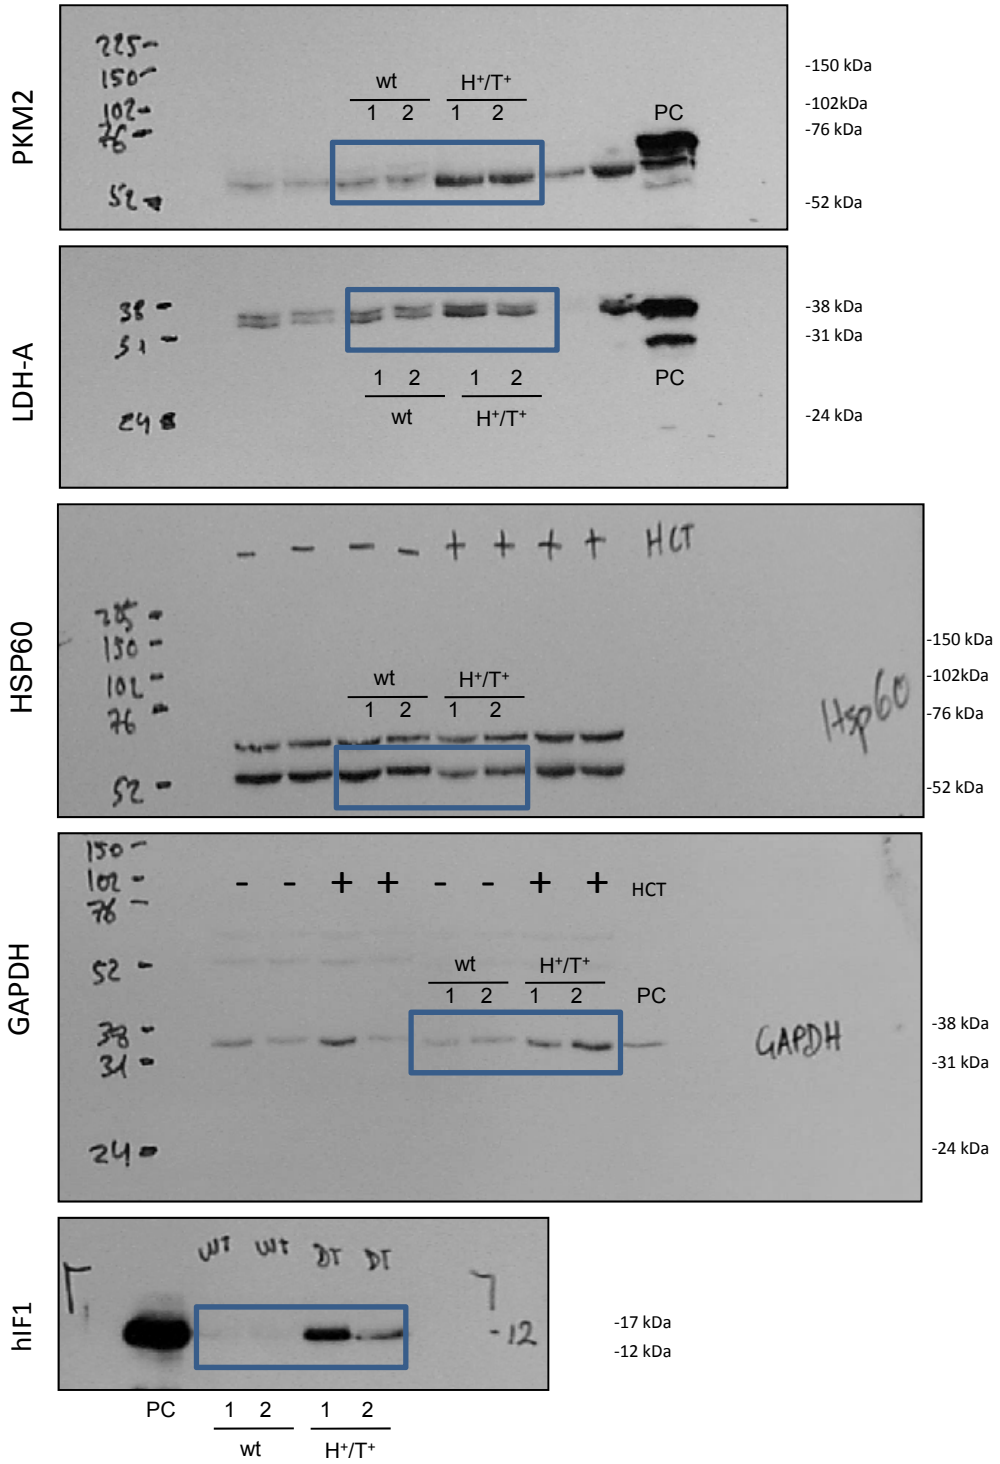

Supplement: embj0033-0762-sd24.pdf [file embj0033-0762-sd24.pdf]
