# Supplementary material
Source: PubMed Central journal article supplement (PMC4000092)

wt: wild phenotype; H<sup>+</sup>/T<sup>+</sup>: double transgenic H49K/tTA; R: right hemisphere; L: left hemisphere

5D

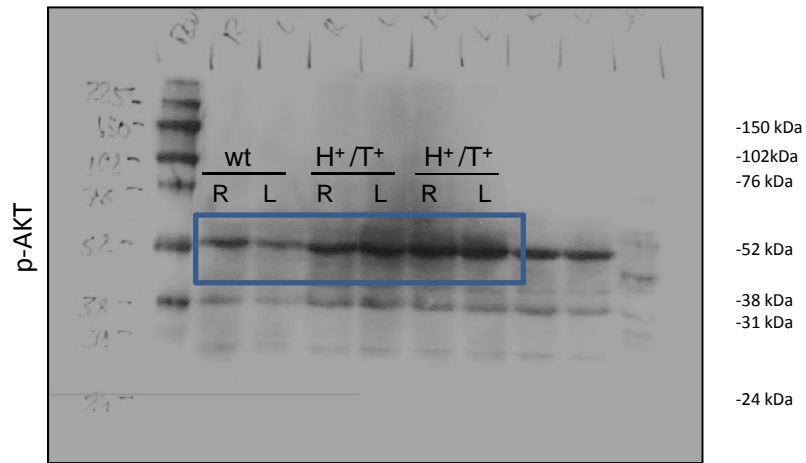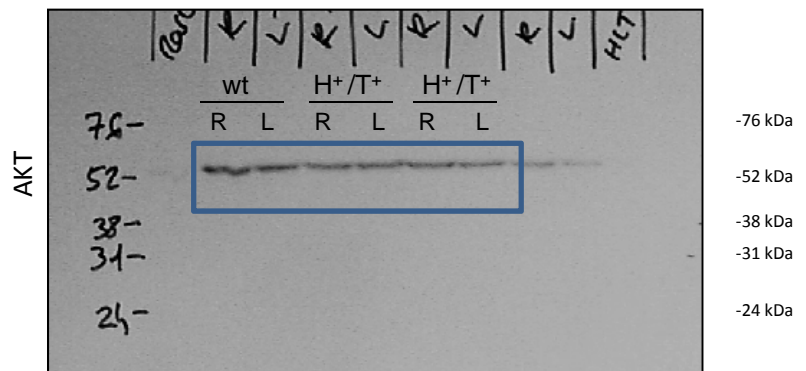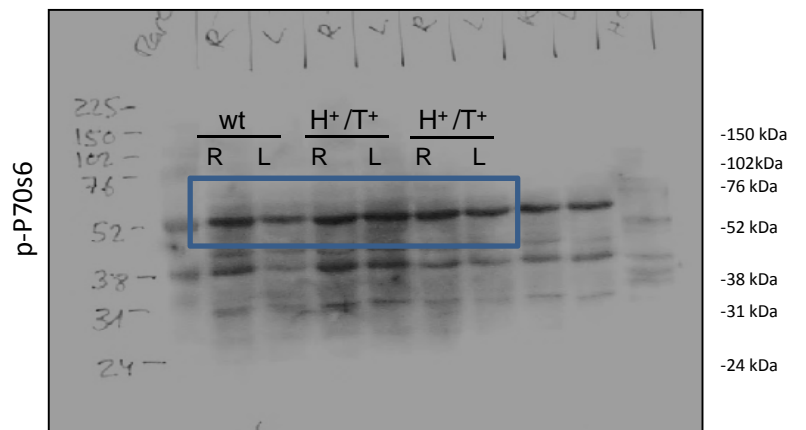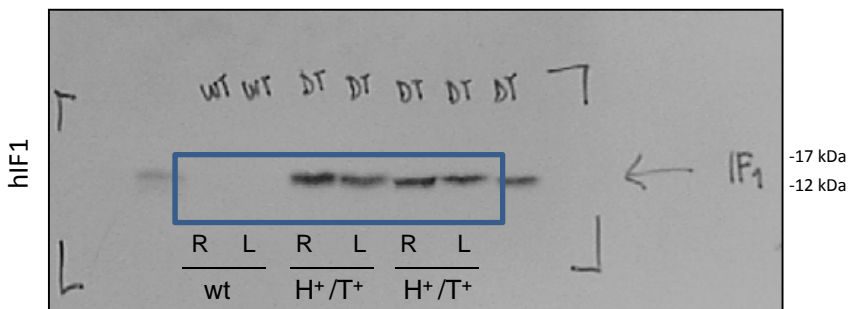

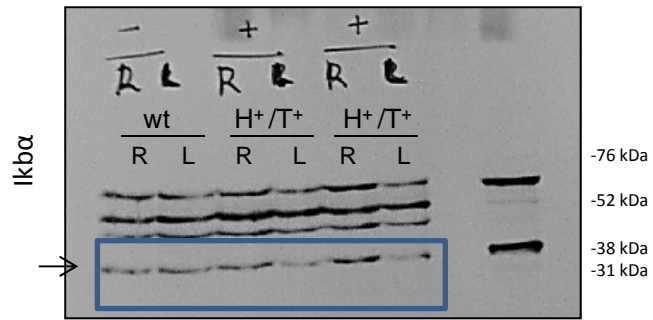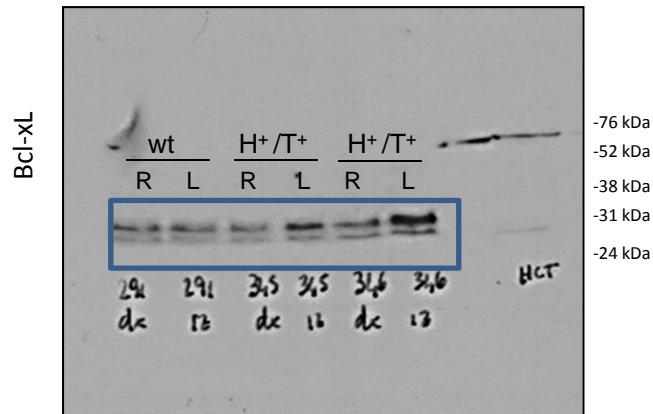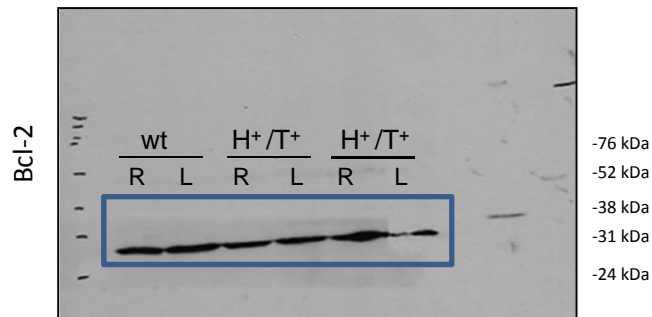

Supplement: embj0033-0762-sd25.pdf [file embj0033-0762-sd25.pdf]
