# Supplementary material
Source: PubMed Central journal article supplement (PMC4000092)

**7A**

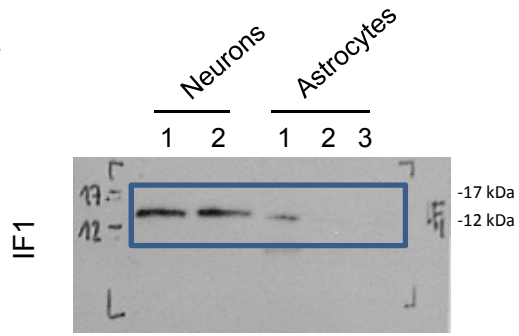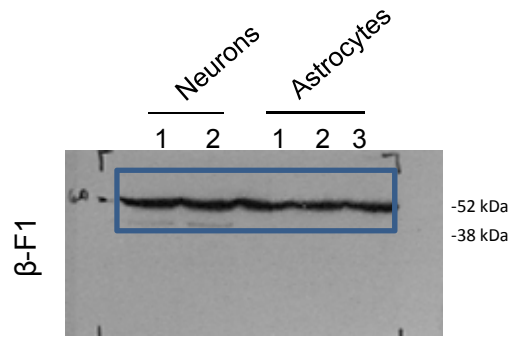

Supplement: embj0033-0762-sd27.pdf [file embj0033-0762-sd27.pdf]
